1 FINE-SCALE ADAPTATIONS TO ENVIRONMENTAL VARIATION AND GROWTH  
2 STRATEGIES DRIVE PHYLLOSHERE *METHYLOBACTERIUM* DIVERSITY.

3  
4 Jean-Baptiste Leducq<sup>1,2,3</sup>, Émilie Seyer-Lamontagne<sup>1</sup>, Domitille Condrain-Morel<sup>2</sup>, Geneviève  
5 Bourret<sup>2</sup>, David Sneddon<sup>3</sup>, James A. Foster<sup>3</sup>, Christopher J. Marx<sup>3</sup>, Jack M. Sullivan<sup>3</sup>, B. Jesse  
6 Shapiro<sup>1,4</sup> & Steven W. Kembel<sup>2</sup>

7  
8 1 - Université de Montréal

9 2 - Université du Québec à Montréal

10 3 – University of Idaho

11 4 – McGill University

12

13 **Key words:** *Methylobacterium* diversity, Phyllosphere community dynamics, *rpoB* barcoding,  
14 temperature adaptation, growth strategies in *Bacteria*

15

16 **Abstract**

17 *Methylobacterium* is a prevalent bacterial genus of the phyllosphere. Despite its ubiquity, little is  
18 known about the extent to which its diversity reflects neutral processes like migration and drift,  
19 or environmental filtering of life history strategies and adaptations. In two temperate forests, we  
20 investigated how phylogenetic diversity within *Methylobacterium* was structured by  
21 biogeography, seasonality, and growth strategies. Using deep, culture-independent barcoded  
22 marker gene sequencing coupled with culture-based approaches, we uncovered a previously  
23 underestimated diversity of *Methylobacterium* in the phyllosphere. We cultured very different  
24 subsets of *Methylobacterium* lineages depending upon the temperature of isolation and growth  
25 (20 °C or 30 °C), suggesting long-term adaptation to temperature. To a lesser extent than  
26 temperature adaptation, *Methylobacterium* diversity was also structured across large (>100km;  
27 between forests) and small geographical scales (<1.2km within forests), among host tree species,  
28 and was dynamic over seasons. By measuring growth of 79 isolates at different temperature  
29 treatments, we observed contrasting growth performances, with strong lineage- and season-  
30 dependent variations in growth strategies. Finally, we documented a progressive replacement of  
31 lineages with a high-yield growth strategy typical of cooperative, structured communities, in

32 favor of those characterized by rapid growth, resulting in convergence and homogenization of  
33 community structure at the end of the growing season. Together our results show how  
34 *Methylobacterium* is phylogenetically structured into lineages with distinct growth strategies,  
35 which helps explain their differential abundance across regions, host tree species, and time. This  
36 works paves the way for further investigation of adaptive strategies and traits within a ubiquitous  
37 phyllosphere genus.

38

### 39 **Abstract importance**

40 *Methylobacterium* is a bacterial group tied to plants. Despite its ubiquity and importance to their  
41 hosts, little is known about the processes driving *Methylobacterium* community dynamics. By  
42 combining traditional culture-dependent and –independent (metagenomics) approaches, we  
43 monitored *Methylobacterium* diversity in two temperate forests over a growing season. On the  
44 surface of tree leaves, we discovered remarkably diverse and dynamic *Methylobacterium*  
45 communities over short temporal (from June to October) and spatial scales (within 1.2 km).  
46 Because we cultured very different subsets of *Methylobacterium* diversity depending on the  
47 temperature of incubation, we suspected that these dynamics partly reflected climatic adaptation.  
48 By culturing strains in lab conditions mimicking seasonal variations, we found that diversity and  
49 environmental variations were indeed good predictors of *Methylobacterium* growth  
50 performances. Our findings suggest that *Methylobacterium* community dynamics at the surface of  
51 tree leaves results from the succession of strains with contrasted growth strategies in response to  
52 environmental variations.

53

54 **Acknowledgments:** FRQNT (funding), NSERC (funding), Canada Research Chairs (funding),  
55 NSF (DEB-1831838), Geneviève Lajoie, Dominique Tardif, Ariane Lafrenière, Hélène Dion-  
56 Phénix, Yves Terrat, Kenta Araya (help for sampling), Sylvain Dallaire (help for phenotyping  
57 screen), Sergey Stolyar (discussions), Gault Natural Reserve (McGill University), Station  
58 Biologique des Laurentides (UdeM), Centre d'Étude de la Forêt (CEF), QCBS.

59

60 **Author contributions :** J.B.L., E.S.L., D.C.M., G.B., B.J.S. and S.W.K. planned fieldwork and  
61 the experiments. J.B.L., E.S.L., D.C.M. and G.B. performed experiments. J.B.L., E.S.L., D.S. and  
62 J.M.S performed bioinformatic analyses. J.A.F., C.J.M. and J.M.S. provided discussion in the

63 early stages of this study. J.B.L. B.J.S. and S.W.K. drafted the manuscript with contributions  
64 from C.J.M.

65  
66 **Data accessibility:** raw reads for *16s* and *rpoB* barcoding on phyllosphere communities  
67 (BioProject PRJNA729807; BioSamples SAMN19164946-SAMN19165146) were deposited in  
68 NCBI under SRA Accession Numbers SRR14532212-SRR14532451. Partial nucleotide  
69 sequences from marker genes obtained by SANGER sequencing on *Methylobacterium* isolates  
70 (BioProject PRJNA730554 ; Biosamples SAMN19190155-SAMN19190401) were deposited in  
71 NCBI under GenBank Accession Numbers MZ268514-MZ268593 (*16s*), MZ330152-MZ330358  
72 (*rpoB*) and MZ330130-MZ330151 (*sucA*). R codes and related data were deposited on Github  
73 (<https://github.com/JBLED/methylo-phylo-diversity>).

74

75

## 76 **Introduction**

77  
78 Phyllosphere, the aerial parts of plants including leaves, is a microbial habitat estimated as vast  
79 as twice the surface of the earth (1). Although exposed to harsh conditions, like UVs, temperature  
80 variations and poor nutrient availability, the phyllosphere harbors a diverse community of  
81 microorganisms, of which bacteria are the most abundant (1). A key challenge in microbial  
82 ecology and evolution is understanding the evolutionary and ecological processes that maintain  
83 diversity in habitats such as the phyllosphere. Bacteria living in the phyllosphere carry out key  
84 functions including nitrogen fixation, growth stimulation and protection against pathogens (1–3).  
85 At broad spatial and temporal scales, bacterial diversity in the phyllosphere varies as a function  
86 of biogeography and host plant species, potentially due to restricted migration and local  
87 adaptation to the biotic and abiotic environment (4–6), leading to patterns of cophylogenetic  
88 evolutionary association between phyllosphere bacteria and their host plants (7). Whether those  
89 eco-evolutionary processes are important at short time scales, as microbes and their host plants  
90 migrate and adapt to changing climates, is still an open question (8). Another challenge is to link  
91 seasonal variation with plant-associated microbial community dynamics, as shifts in microbial  
92 community composition are tightly linked with host plant carbon cycling (9) and ecosystem  
93 functions including nitrogen fixation (10). More generally, we understand very little about how  
94 the ecological strategies of phyllosphere bacteria vary among lineages and in response to  
95 variation in environmental conditions throughout the growing season (9, 11).

96  
97 Phylogenetic signal in traits or suites of correlated traits that are used as indicators of the  
98 ecological life history strategy of microbes suggest niche adaptation (12), and these phenotypic  
99 traits influence the assembly of ecological communities through their mediation of organismal  
100 interactions with the abiotic and biotic environment (13). Recent work evaluating the  
101 phylogenetic depth of microbial trait evolution has shown that many microbial phenotype traits  
102 exhibit phylogenetic signal, with closely related lineages possessing similar phenotypic traits,  
103 although the phylogenetic depth at which this signal is evident differs among traits (14). Most  
104 comparative studies of microbial trait evolution have focused on broad scale patterns across  
105 major phyla and classes (14), although some studies have found evidence for complex patterns of  
106 phenotypic and genomic evolution within microbial genera interacting to determine patterns of

107 community assembly and niche evolution (15, 16). Furthermore, to date the majority of studies of  
108 the diversity of plant-associated microbes have been based on the use of universal marker genes  
109 such as the bacterial 16S rRNA gene, providing a global picture of long-term bacterial adaptation  
110 to different biomes and host plants at broad phylogenetic scales (17), but lacking sufficient  
111 resolution to assess the evolutionary processes at finer spatial and temporal scales that lead to the  
112 origin of and adaptations within microbial genera and species (18, 19).

113  
114 The Rhizobiales genus *Methylobacterium* (*Alphaproteobacteria*, *Rhizobiales*,  
115 *Methylobacteriaceae*) is one of the most prevalent bacterial genera of the phyllosphere, present  
116 on nearly every plant (20, 21). Characterized by pink colonies due to carotenoid production,  
117 *Methylobacterium* are facultative methylotrophs, able to use one-carbon compounds, such as  
118 methanol excreted by plants, as sole carbon sources (21–23). Experimental studies have shown  
119 the important roles of *Methylobacterium* in plant physiology, including growth stimulation  
120 through hormone secretion (24–26), heavy metal sequestration (26), anti-phytopathogenic  
121 compound secretion, and nitrogen fixation in plant nodules (27), sparking increasing interest in  
122 the use of *Methylobacterium* in plant biotechnology applications (26, 28, 29). Although up to 64  
123 *Methylobacterium* species have been described (30–38), genomic and phenotypic information  
124 was until recently limited to a small number of model species: *M. extorquens*, *M. populi*, *M.*  
125 *nodulans*, *M. aquaticum* and *M. radiotolerans*, mostly isolated from anthropogenic environments,  
126 and only rarely from plants (39–43). Newly available genomic and metagenomic data now allow  
127 a better understanding of *Methylobacterium* diversity across biomes (30), but we still understand  
128 relatively little about the drivers of the evolution and adaptation of *Methylobacterium* in natural  
129 habitats.

130  
131 In this study, we assessed the diversity of *Methylobacterium* in temperate forests and asked  
132 whether *Methylobacterium* associated with tree leaves act as an unstructured population with  
133 large effective size, or if this diversity was maintained by regional factors (*e.g.* a combination of  
134 isolation by distance and regional environmental variation) or by niche adaptation (*e.g.* host tree  
135 or temperature adaptation) (12). First, we assessed *Methylobacterium* diversity by combining  
136 culturing and barcoding approaches along with phylogenetic analysis and quantified how this  
137 diversity varied across space, time, and environment in the phyllosphere. Second, we quantified

138 the extent of phylogenetic niche differentiation within the bacterial genus *Methylobacterium*,  
139 with a focus on quantifying the evidence for adaptation to local environmental variation at  
140 different spatial, temporal and phylogenetic scales. We hypothesized that distinct phylogenetic  
141 lineages would be associated with distinct environmental niches. Third, we quantified  
142 *Methylobacterium* growth performance under fine-scale environmental variations, with a focus  
143 on temperature, to determine whether *Methylobacterium* diversity fine-scale dynamics over space  
144 and time might result from environmental filtering of isolates with contrasting growth strategies  
145 under local environmental conditions. We found that *Methylobacterium* phyllosphere diversity  
146 consisted of deeply branching phylogenetic lineages associated with distinct growth phenotypes,  
147 isolation temperatures, and large-scale spatial effects (forest of origin), while finer-scale spatial  
148 effects, host tree species, and time of sampling were more weakly and shallowly phylogenetically  
149 structured. Over the course of a year, from spring to fall, we observed a homogenization of  
150 *Methylobacterium* community structure coinciding with the progressive replacement of isolates  
151 with high yield strategy by isolates with rapid growth. Together our results show that this  
152 ubiquitous phyllosphere genus is structured into lineages with distinct growth strategies, which  
153 helps explain their differential abundance across space and time.

154

## 155 **Results**

156

157 *Phylogenetics of plant-associated Methylobacterium diversity.*

158

159 We evaluated the known *Methylobacterium* diversity associated with plants, especially the  
160 phyllosphere, by compiling information about the origin of 153 *Methylobacterium* isolates for  
161 which genomes were available. We found that plants (65% of genomes) and especially the  
162 phyllosphere compartment (41% of genomes) were the most prevalent source of  
163 *Methylobacterium*. From these genomes, we built a phylogenetic tree based on the complete  
164 nucleotide sequence of *rpoB*, a highly polymorphic marker that experienced no copy number  
165 variation in many bacteria taxa (44, 45), and that we confirmed to be single copy in  
166 *Methylobacterium* and related genera *Microvirga* and *Enterovirga* (**Figure 1, Supplementary**  
167 **dataset 1a**). In this phylogeny, we roughly identified main *Methylobacterium* groups (A, B, and  
168 C) previously defined based on the 16S gene (30) and found that phyllosphere-associated

169 diversity was not randomly distributed in the *Methylobacterium* phylogenetic tree. Isolates from  
170 the phyllosphere represented the largest part of diversity within group A (56% of isolates) but not  
171 in groups B and C (17 and 12% of isolates, respectively). Most of diversity within group A  
172 consisted of undescribed taxa falling outside previously well-described lineages (**Figure 1**,  
173 **Supplementary dataset 1a**). For the purpose of this study, we refined *Methylobacterium* group  
174 A that we subdivided into 9 monophyletic clades (A1-A9), using a ~92% pairwise similarity (PS)  
175 cut-off on the *rpoB* complete sequence.

176

177 *16S Community analyses reveal Methylobacterium ubiquity and diversity in the phyllosphere.*

178

179 We focused on *Methylobacterium* phyllosphere diversity variation observable at the scale of  
180 seasonal variation on individual trees within a geographic region, the temperate forests of  
181 northeastern North America (**Figure 2a,b**). In two forests: Mont Saint Hilaire (MSH; 45.54 N  
182 73.16 W ; **Figure 2c**) and Station biologique des Laurentides (SBL; 45.99 N 73.99 W ; **Figure**  
183 **2d**), we marked 40 trees representative of diversity observed in 4-6 plots distributed along a 1.2  
184 km transect (4-10 trees per plot). In MSH, the transect followed an elevation and floristic  
185 gradient, while in SBL, it followed a relatively constant environment. For this time series, each  
186 tree was sampled 3-4 times from June to October 2018 (**Figure 2b**; **Supplementary dataset 1b**).  
187 We evaluated the microbial phyllosphere diversity in our time series based on sequencing and  
188 identification of bacterial 16S gene amplicon sequence variants (ASVs; (46)) in a representative  
189 subset of 46 phyllosphere samples from 13 trees (**Supplementary dataset 1c-e**). As observed in  
190 previous studies (4), the distribution of the phyllosphere bacterial community was mostly  
191 explained by differences among forests (31.6% of variation explained;  $p < 0.001$ ; PERMANOVA;  
192 Hellinger transformation; 10,000 permutations), host tree species (15.6% of variation;  $p < 0.001$ )  
193 and time of sampling (12.0%;  $p < 0.05$ ; **Table 1**), indicating that between-forest variation and  
194 adaptation to hosts were the main drivers of this diversity, which also varied greatly at the time  
195 scale of a year. Although representing only 1.3% (0.0-3.2% per sample) of total 16S sequence  
196 diversity, *Methylobacterium* was present in almost all analyzed samples (45 out of 46;  
197 **Supplementary dataset 1d,e**). We assigned the 15 *Methylobacterium* ASVs identified by 16S  
198 sequencing to clades from *Methylobacterium* group A: A9 (*M. phyllosphaerae*/*M.*  
199 *mesophilicum*/*M. phyllostachyos*/*M. pseudosasicola*/*M. organophilum*; 0.87% of total diversity,

200 nine ASVs), A6 (*M. sp.*, 0.29%; one ASV) and A1 (*M. gossipicola*; 0.13%, 3 ASVs;  
201 **Supplementary dataset 1e**). With two rare ASVs (<0.01% of relative abundance) assigned to *M.*  
202 *komagatae*, belonging to group A (30) but unrelated to any aforementioned clade, we defined a  
203 new clade (A10). No ASV was assigned to group B or group C, hence confirming observations  
204 from available genomes that *Methylobacterium* group A is tightly associated with the  
205 phyllosphere.

206  
207 *Development of a single-copy molecular marker to monitor fine-scale dynamics of*  
208 *Methylobacterium* *populations.*

209  
210 Although the 16S barcoding approach suggests that *Methylobacterium* is ubiquitous in the  
211 phyllosphere of temperate forests, regardless of location, time and host tree species, identification  
212 based on 16S sequencing presents some limits in assessing microbial population dynamics at  
213 local scales, and in assessing fine-scale evolutionary adaptations (18). First, the low  
214 polymorphism of the 16S rRNA gene does not permit distinguishing among species within clades  
215 typical of the phyllosphere, thus confounding species with potentially divergent evolutionary  
216 routes reflecting the distinct ecological niches they occupy within the phyllosphere. Second, 16S  
217 copy number variation within *Methylobacterium* (4-12) and even within groups of closely related  
218 isolates (4-6 copies in group A; 5 in group B; 6-12 copies in group C), may induce biases in  
219 estimating relative abundances of taxa, and thus in assessing the dynamics of populations over  
220 space, time and among host tree species.

221  
222 To assess *Methylobacterium* diversity at a finer evolutionary level, we thus developed a  
223 molecular marker targeting all members of the *Methylobacteriaceae* family, using the core gene  
224 *rpoB* (**Figure 1** (44, 45)). Based upon *rpoB* sequences available for *Methylobacterium*  
225 (**Supplementary dataset 1a**), as well as sequencing of *rpoB* partial sequences from 20  
226 *Methylobacterium* isolates from a pilot survey in MSH in 2017 (**Figure 2d; Table S1;**  
227 **Supplementary dataset 1f,g**) we determined that this gene is polymorphic enough to explore  
228 diversity within the aforementioned *Methylobacterium* clades (See **supplementary method**). For  
229 the rest of this study, we used the *rpoB* marker to monitor temporal trends in *Methylobacterium*  
230 diversity in the phyllosphere from our 2018 time series in both forests.



231  
232 *Culture-based assessment of Methylobacterium diversity in the tree phyllosphere.*  
233  
234 We evaluated the culturable part of *Methylobacterium* diversity from a subsample of 36 trees (18  
235 per forest) representative of floral diversity in the 2018 time series in MSH and SBL. To date,  
236 *Methylobacterium* was mostly isolated assuming its optimal growth was in the range 25-30 °C  
237 (47), an approach that could lead to a bias toward mesophylic isolates in estimating microbial  
238 diversity, especially in the case of microbes inhabiting temperate forests where temperatures  
239 typically range from 10 to 20 °C during the growing season (48). We thus performed replicate  
240 isolation of *Methylobacterium* at both 20 and 30 °C on minimum mineral salt (MMS) media with  
241 0.1% methanol as sole carbon source. We successfully amplified the *rpoB* marker for 167 pink  
242 isolates that we assigned to *Methylobacterium* based upon their phylogenetic placement  
243 (**Supplementary dataset 1g,h; Supplementary method**). As observed for 16S ASVs, most  
244 isolates were assigned to clades from group A typical of the phyllosphere: A9 (59.9% of isolates),  
245 A6 (24.6%), A1 (5.4%), A10 (3.6%) and A2 (1.8%). Few isolates were assigned to group B  
246 (4.2% of isolates), mostly related to *M. extorquens*, and none to group C (**Table S2**). But the  
247 higher polymorphism in the *rpoB* marker allowed us to uncover a considerable diversity within  
248 clades, as we identified 71 unique *rpoB* sequences, in contrast to the smaller number obtained  
249 with 16S barcoding (15 ASVs).  
250  
251 Such high diversity in *rpoB* suggests that standing genetic variation is segregating within  
252 *Methylobacterium* populations inhabiting the phyllosphere. We hypothesized that the  
253 maintenance of this diversity could be explained by regional factors (*e.g.* a combination of  
254 isolation by distance and regional environmental variation) and/or by niche adaptation (*e.g.* host  
255 tree or temperature adaptation)(12). To do so, we quantified associations between  
256 *Methylobacterium* diversity assessed at varying depths in the *rpoB* phylogeny (**Supplementary**  
257 **method; Figure 3a**) with four factors and their interactions (PERMANOVA with 10,000  
258 permutations): (1) forest of sampling (2) temperature of isolation, (3) sampling time, and (4) host  
259 tree species. For every phylogenetic depth tested, diversity had distinct associations with forest of  
260 origin ( $4.5\pm 1.0\%$  of variance explained;  $p<0.001$ ) and temperature of isolation ( $5.9\pm 2.1\%$  of  
261 variance explained;  $p<0.001$ ; **Figure 3a; Supplementary dataset 1i**). Interestingly, temperature

262 of isolation was the most important factor distinguishing deep phylogenetic divergences (pairwise  
263 nucleotide similarity range: 0.948-0.993), while forest of origin was slightly more important in  
264 structuring more recently diverged nodes (pairwise nucleotide similarity >0.993). This suggests  
265 that mechanisms underlying isolation success at different temperatures played a significant role  
266 in the early divergence among *Methylobacterium* clades associated with tree leaves, while spatial  
267 variation among different forests evolved more recently. Time of sampling had a slight but  
268 significant effect on diversity ( $2.1 \pm 0.2\%$  of variance explained;  $p < 0.05$ ) and it was only observed  
269 for higher pairwise nucleotide similarity values (range 0.994-1.000), suggesting seasonal  
270 *Methylobacterium* diversity dynamics at the tip of the tree. We did not observe any significant  
271 effect of host tree species on *Methylobacterium* isolate diversity, for any level of the phylogeny,  
272 suggesting no strong specific associations between *Methylobacterium* isolates and the tree species  
273 from which they were isolated.

274  
275 We next asked specifically which nodes within the *Methylobacterium* phylogenetic tree were  
276 associated with the two major factors contributing to overall diversity, namely forest and  
277 temperature of isolation (**Figure 3a**). For every level in the *rpoB* phylogeny, we independently  
278 tested for nodes (with at least 30% of support) associated with forest of origin (SBL and MSH) or  
279 temperature of isolation (20 and 30 °C) by permutation (100,000 permutations per level and per  
280 factor; **Figure 3b**). We identified two nodes strongly associated with temperature of isolation and  
281 corresponding to clades A6 (20 °C;  $p < 0.001$ ) and A9+A10 (30 °C;  $p < 0.001$ ; **Figure 3b**). Other  
282 clades were evenly isolated at 20 and 30 °C and we observed no significant association between  
283 temperature of isolation and nodes embedded within clades. Nodes associated with forest of  
284 origin also roughly corresponded to certain major clades, with clades A1+A2 almost exclusively  
285 sampled in MSH ( $p < 0.01$ ). Overall, clade A9 was isolated significantly more often in SBL  
286 ( $p < 0.001$ ) but at least three of its subclades were significantly associated to either MSH or SBL  
287 ( $p < 0.05$ ), suggesting relatively recent migration events. The fact that *Methylobacterium* diversity  
288 typical of the phyllosphere show contrasted associations with forest and temperature of isolation  
289 suggests that their evolution was tightly linked with processes related to spatial and  
290 environmental variation including isolation by distance as well as niche-based processes  
291 including adaptation to local climatic conditions.

292

293 *Comparison of Methylobacterium diversity assessed by rpoB barcoding and isolation*

294

295 To determine if these culture-based results were representative of the potentially uncultured  
296 *Methylobacterium* diversity, we developed a culture-independent barcoded amplicon sequencing  
297 approach based on *rpoB*. We performed *rpoB* amplicon sequencing for 179 leaf samples from 53  
298 trees in both forests, allowed a monthly monitoring for most trees (**Supplementary dataset 1c,j**).  
299 We identified 283 *Methylobacteriaceae rpoB* ASVs in these samples (**Supplementary dataset**  
300 **1j,k**), representing 24.6% of all sequences. Non-*Methylobacteriaceae* ASVs were mostly  
301 assigned to other Rhizobiales families (850 ASVs, 70.33% of sequence abundance) and to  
302 Caulobacterales (209 ASVs, 4.42% of sequence abundance) typical of the phyllosphere (see  
303 **Supplementary method**), suggesting that our *rpoB* marker is not limited to *Methylobacteriaceae*  
304 and can potentially be used at a broader taxonomic scale (**Figure S1a**). Within  
305 *Methylobacteriaceae*, ASVs were mostly classified as *Methylobacterium* (200 ASVs, 23.05% of  
306 sequence relative abundance), and *Enterovirga* (78 ASVs, 1.56%; **Supplementary dataset 1k**).  
307 We assigned *Methylobacterium* ASVs to previously defined clades using a maximum likelihood  
308 tree combining ASV sequences and reference genomes (**Figure S1b**). Most of *Methylobacterium*  
309 diversity was within the previously cultured clades A9 (45.2% of *Methylobacterium* sequence  
310 abundance), A6 (24.3%), A1 (6.1%) and A10 (1.0%; **Supplementary dataset 1j; Table S2**).  
311 Estimates of *Methylobacterium* diversity based on *rpoB* sequences from culture-independent  
312 sequencing or cultured isolates were generally concordant (**Figures S1c,d; Table S2**).  
313 Nevertheless, we cannot exclude the possibility that some diversity was not isolated. For  
314 instance, although 19.1% of total *Methylobacterium* diversity assessed by *rpoB* culture-free  
315 barcoding was assigned to group B, it only represented 4.2% of isolates. One possible  
316 explanation could be adaptation of some isolates from this group to temperatures below the range  
317 used for isolation (20-30 °C), as temperatures at the very beginning (May) and end (October) of  
318 the growing period in Quebec typically range between 5 and 15°C.

319

320 *Fine-scale temporal and spatial distribution of Methylobacterium diversity assessed by rpoB*  
321 *barcoding*

322

323 Our isolate-based survey suggested that the distribution of *Methylobacterium* diversity was  
324 driven by both spatial and seasonal variation. This result was largely supported using the culture-  
325 free approach (*rpoB* barcoding). Specifically, we found that spatial variation at both large  
326 (distance between forests: 100km) and local scales (distance between plots within forest: 150-  
327 1,200 m), as well as sampling date during the growing season (1-5 months), explained the largest  
328 part of variance in the community composition of 200 *Methylobacterium* ASVs (proportion of  
329 variation explained: 32.4%, 8.0% and 4.8%, respectively;  $p < 0.001$ ; PERMANOVA; Hellinger  
330 transformation, Bray-Curtis dissimilarity, 10,000 permutations; **Table 1**). A large proportion of  
331 *Methylobacterium* ASVs (83 out of 200) were significantly associated with one or either forest  
332 (ANOVA; Bonferroni correction; **Figure 4a; Supplementary dataset 11**), regardless their clade  
333 membership. The only exception was observed for clade A1, which was almost exclusively  
334 observed (and isolated; see **Figure 3b**) in the MSH forest. Also consistent without our isolation-  
335 based results, we found no clear association between ASV or clade with host tree species, nor  
336 plots within forests (data not shown).

337  
338 To focus on temporal variation and fine-scale spatial effects, we removed large-scale spatial  
339 variation by analyzing each forest separately. We quantified fine-scale spatial and temporal  
340 dynamics of *Methylobacterium* diversity (200 ASVs), using autocorrelation analysis based on  
341 Bray-Curtis dissimilarity index (*BC*). We observed a weak but significant decrease of community  
342 similarity with geographical distance separating two samples within MSH (ANOVA on linear  
343 model;  $p < 0.001$ ) but not SBL ( $p > 0.05$ , **Table 2, Figure 4b**), and a significant decrease of  
344 community similarity with time separating two samples in both forests (ANOVA on linear  
345 model;  $p < 0.001$ ; **Table 2**), which was more marked in MSH than in SBL (**Figure 4c**). Both  
346 results indicate that *Methylobacteriaceae* diversity is heterogeneously distributed even at very  
347 local space and time scales. The overall community dissimilarity consistently decreased from  
348 June to October in both MSH (from 0.624 to 0.297) and SBL (from 0.687 to 0.522; **Table 2,**  
349 **Figure 4d**), suggesting that *Methylobacteriaceae* diversity was progressively homogenized by  
350 migration or ecological filtering between the beginning and the end of the growing season at the  
351 scale of a forest, although without affecting locally its heterogeneous spatial distribution in MSH  
352 (**Table 2, Figure 4e**). The heterogeneous spatial distribution of *Methylobacterium* diversity  
353 observed in MSH forest suggests either more restricted migration than in SBL, and/or local

354 adaptation due to environmental gradients. One possible explanation is that the floristic and  
355 altitudinal gradient observed in MSH (**Figure 2d**) – but not in SBL – might generate local  
356 adaptation to host tree species for *Methylobacterium* colonizing leaves in this more  
357 heterogeneous forest, hence counteracting the homogenizing effect of neutral processes like  
358 migration (49). Accordingly, we found slight but significant effects of host tree species, and of  
359 the interaction between host tree species and plots within forests, on *Methylobacterium*  
360 community composition (explaining 7.1% and 4.3% of variation in community composition;  
361  $p < 0.001$  and  $p < 0.01$ , respectively; PERMANOVA; **Table 1**).

362  
363 We tested for temporal autocorrelation in each node of the ML tree (**Figure S1b**) supported by at  
364 least 30% of bootstraps (200 permutations) and observed significant temporal dynamics (as  
365 attested by the positive slope between pairwise time and BC dissimilarity) in most testable nodes  
366 (ANOVA, Bonferroni correction; **Figure 4f**). We observed the strongest temporal signals in  
367 nodes embedded within clades A1 (MSH) and B (both forests). Accordingly, we found 25 ASVs  
368 whose abundance significantly increased throughout the growing season (ANOVA; Bonferroni  
369 correction;  $p < 0.05$ ), mostly belonging to clades A1 ( $n=11$ ). Four ASVs increased significantly  
370 with time in both forests and mostly belonged to group B ( $n=3$ ), suggesting that at least a part of  
371 the characteristics driving short-term dynamics of *Methylobacterium* communities are shared  
372 among members of different clades within the genus (**Supplementary dataset 1l**).

373  
374 *Effect of short scale temperature variation in combination with other environmental and genetic*  
375 *factors on Methylobacterium growth performances*

376  
377 A major environmental difference between forest sites and throughout the growing season relates  
378 to shifts in temperature, suggesting, together with temperature preference of some clades during  
379 the isolation step, that *Methylobacterium* diversity dynamics we observed over space and time  
380 might result from clade contrasted growth performances under local climatic conditions. To  
381 further explore the role of temperature, we measured growth of 79 *Methylobacterium* isolates  
382 (sampled in 2018 in both forests; MSH:  $n=32$ , SBL:  $n=47$  ; **Supplementary dataset 1m**) for four  
383 temperature treatments mimicking temperature variations during the growing season. Each  
384 treatment consisted of an initial pre-conditioning step (*P*) during which each isolate was

385 incubated on solid MMS media with methanol as sole carbon source for 20 days at either 20 °C  
386 (*P20*) or 30 °C (*P30*), and a second monitoring step (*M*) during which pre-conditioned isolates  
387 were incubated on the same media and their growth monitored for 24 days at 20 °C (*P20M20* and  
388 *P20M30*) or 30 °C (*P30M20* and *P30M30*; **Figure S2**). Treatments *P20M20* and *P30M30*  
389 mimicked stable thermal environments, and treatments *P20M30* and *P30M20* mimicked variable  
390 thermal environments. For each isolate and temperature treatment, logistic growth curves were  
391 inferred from bacteria spot intensity variation observed over three time points during the  
392 monitoring step (**Figures S2, S3**). From growth curves, we estimated maximum growth intensity,  
393 or yield (*Y*) and growth rate (*r*) as the inverse of lag+log time necessary to reach *Y* (**Figure S4**  
394 (50, 51)). Clade membership explained a large part of variation in *Y* and *r* (30.6 and 7.6% of  
395 variation explained, respectively; ANOVA;  $p < 0.001$ ), indicating that *Methylobacterium* growth  
396 performance is largely long-term inherited and tends to be shared among clade members (**Figures**  
397 **5a,b, Table 3**). Certain clades had a higher yield range than others, suggesting differences in their  
398 carbon use efficiency (51), here provided by methanol. For example, group B isolates ( $Y = 12.2 \pm$   
399  $5.0$ ) have higher yield than group A ( $Y = 5.4 \pm 3.5$ ). Different growth rates rather suggest  
400 contrasted growth strategies across clades (51, 52). Isolates from clades A1, A2 and B had the  
401 highest growth rate (*r* range:  $0.101 \pm 0.032 - 0.121 \pm 0.031$ ), suggesting they have fast-growth  
402 strategy. Other clades (A6, A9 and A10) had on average slower growth (*r* range:  $0.082 \pm 0.021 -$   
403  $0.088 \pm 0.024$ ), suggesting that they have more efficient strategy (51).

404  
405 Compared to clade membership, we observed that time of sampling, host tree species and forest  
406 explained less variation in growth rate (5.4%,  $p < 0.001$ ; 2.2%,  $p < 0.01$  and 1.5%,  $p < 0.05$ ,  
407 respectively; ANOVA; **Table 3**), suggesting that plasticity to the environment was a secondary  
408 but still determining factor in strain growth strategy. The weak or non-significant interactions  
409 between clade membership and the aforementioned environmental factors (ANOVA; **Table 3**)  
410 suggest that these patterns were consistent across clades, indicating they are unlikely to result  
411 from long-term adaptation but rather correspond to short-term responses to environmental  
412 conditions. In both SBL and MSH, growth rate increased consistently from June ( $r =$   
413  $0.075 \pm 0.018$  and  $0.085 \pm 0.033$ , respectively) to September/October ( $r = 0.097 \pm 0.031$  and  
414  $0.103 \pm 0.027$ , respectively; **Figure 5c**). Growth rate increase thorough the season might result  
415 from increasing competition within phyllosphere communities, for instance by selection for faster

416 growth. Accordingly, culture-independent *rpoB* confirmed that clades associated with faster  
417 growth (clades B and A1) increased in abundance over time.

418  
419 Temperature also had significant effects on growth performance. Temperature during the  
420 monitoring phase explained respectively 2.0% and 15.8% of variation in yield and growth rate  
421 ( $p < 0.01$  and  $p < 0.001$ , respectively; ANOVA; **Figure 5d, Table 3**), regardless of clade  
422 membership (no significant interaction in the ANOVA). Isolates incubated at 20 °C have on  
423 average higher yield ( $Y = 6.9 \pm 5.4$ ) but slower growth ( $r = 0.077 \pm 0.022$ ) than isolates incubated at  
424 30 °C ( $Y = 4.9 \pm 3.6$ ;  $r = 0.100 \pm 0.030$ ), suggesting that higher temperature tends to shift  
425 *Methylobacterium* toward faster growth but lower efficiency, a typical trade-off observed in other  
426 bacteria (51). The effect of monitoring temperature on growth rate was also independent from  
427 time of sampling (no significant interaction in the ANOVA), suggesting that *Methylobacterium*  
428 also grow faster and less efficiently at 30 °C regardless temporal environmental variations.  
429 Accordingly, the pre-conditioning temperature had no effect on growth rate ( $p > 0.05$ ; ANOVA),  
430 and very limited on yield (1.4%;  $p < 0.05$ ; ANOVA), suggesting limited effect of short-time  
431 temperature shift on *Methylobacterium* growth performance (**Table 3**).

432

## 433 **Discussion**

434

435 *Methylobacterium* is ubiquitous on leaves in the temperate forests of Québec and its diversity in  
436 this habitat is quite similar to what has been described in the phyllosphere throughout the world,  
437 with three main clades A9 (*M. brachiatum*, *M. pseudosasicola*), A6 (*M. sp.*) and A1 (*M.*  
438 *gossipicola*) dominating diversity in the canopy. Our barcoding approach based on a clade-  
439 specific *rpoB* marker revealed astonishing diversity within these clades, as well as within several  
440 other clades: B (*M. extorquens*), A2 (*M. sp.*), A4 (*M. gnaphalii*, *M. brachytecii*) and A10 (*M.*  
441 *komagatae*) whose importance in the phyllosphere has been underestimated by classical 16S  
442 barcoding or isolation approaches. This diversity, like that of the overall phyllosphere  
443 community, was mostly determined by differences between forests, with barcoding approaches  
444 suggesting combined effects of restricted migration, local adaptation to host tree species, and  
445 climatic conditions at large geographical scales (>100km). With higher molecular resolution, we  
446 observed that *Methylobacterium* diversity was structured even at the scale of a forest (within 2

447 km), which according to a fine-scale timeline survey over the growing season also showed a clear  
448 pattern of temporal dynamics and succession. A finer analysis of *Methylobacterium* diversity  
449 suggested that clade identity partly explained *Methylobacterium* geographical distribution at large  
450 scale (forest) but not at finer scales (plots), nor was it an indicator of adaptation to a particular  
451 host tree species, nor a determinant of temporal dynamics. Rather, the distribution of  
452 *Methylobacterium* diversity at small temporal and geographical scales likely resulted from more  
453 contemporaneous community assembly events selecting for phenotypic traits that evolved among  
454 deeply diverging lineages of *Methylobacterium*, as has been observed in other bacterial (16) and  
455 plant clades (53).

456  
457 We explored mechanisms explaining the temporal dynamics of *Methylobacterium* diversity at the  
458 scale of a growing season. Because we observed contrasting *Methylobacterium* isolable diversity  
459 between 20 and 30 °C, we suspected that adaptation to temperature variation during the growing  
460 season could explain part of these temporal dynamics. By monitoring *Methylobacterium* isolate  
461 growth under different temperature treatments, we confirmed that temperature affected isolate  
462 growth performances. The fact that most tested isolates grow slower but more efficiently at 20 °C  
463 than at 30 °C (**Figure 5d**), regardless of their phylogenetic and environmental characteristics, is  
464 in line with a temperature-dependent trade-off between growth rate and yield described in many  
465 bacteria (reviewed in (51)). High yield strategies are typical of cooperative bacterial populations,  
466 while fast growth-strategies are typical of competitive populations (51), suggesting that 20 °C is  
467 likely closer to the thermal niche of a cooperative *Methylobacterium* community, in agreement  
468 with average temperatures in temperate forests during the growing season. This observation also  
469 stresses the importance of considering incubation temperature when interpreting results from  
470 previous studies assessing *Methylobacterium* diversity based on isolation. We observed several  
471 lines of evidence that factors other than direct adaptation to temperature drive *Methylobacterium*  
472 responses to temperature variation, by affecting their growth strategy in different competitive  
473 conditions rather than by affecting their metabolism directly. First, clade identity was one of the  
474 main predictors of overall isolate performance, with some clades (A1, A2, B) possessing a rapid  
475 growth strategy under all temperature conditions, while others (clades A6, A9, A10) had  
476 systematically slower growth. These clade-specific growth strategies could explain for instance  
477 why certain *Methylobacterium* isolates are less competitive and less frequently isolated at higher



478 temperatures. Still, we cannot rule out that clade-specific growth strategy also reflect  
479 experimental conditions. Second, we observed strong associations between isolates growth  
480 performance and time of sampling, regardless of clade association, suggesting that growth  
481 dynamic strategies also respond to seasonal variations in environmental conditions, and to the  
482 level of establishment and competition in the phyllosphere community (51). This observation,  
483 together with clade identity, could explain why, assuming that environmental conditions at the  
484 end of the growing season became unfavorable for most strains, isolates from clades A1 and B  
485 with a fast-growth strategy consistently increase in frequency during this period and lead to the  
486 homogenization of the community. Taken together, our temporal survey of diversity dynamics  
487 and screening for growth performance suggest the following timeline of the dynamics of the  
488 *Methylobacterium* phyllosphere community. At the very beginning of the growing season, a pool  
489 of bacteria with mixed ecological strategies and genotypes colonizes newly emerging leaves. Due  
490 to the stochasticity of this colonization, we initially observe strong dissimilarity among  
491 phyllosphere communities, regardless of their spatial position. During the summer, optimal  
492 environmental conditions allow the progressive establishment of a cooperative and structured  
493 bacterial community with a high yield strategy (51). At the end of the growing season, with  
494 migration, environmental conditions shifting and leaves senescing, isolates with a fast-growth  
495 strategy are able to grow rapidly, dominating the phyllosphere community and leading to its  
496 homogenization before leaves fully senesce.

497  
498 Our study illustrates that *Methylobacterium* is a complex group of divergent lineages with  
499 different ecological strategies and distributions, reflecting long-term adaptation to highly  
500 contrasted environments. Based upon a similar observation, some authors recently proposed to  
501 reclassify *Methylobacterium* group B within a new genus (*Methylorubrum*) that they argue is  
502 ecologically and evolutionarily distinct from other *Methylobacterium* clades (30). Although clade  
503 B was well supported as a distinct clade in our analyses, our results suggest that it is in fact  
504 embedded within clade A, which would render the genus *Methylobacterium* paraphyletic if clade  
505 B is defined as a distinct genus (**Figure S5**), and group B was not particularly ecologically  
506 distinct in comparison with other major clades (**Figure 1**). Our results emphasize the fact that  
507 thorough genomic investigations are needed to clarify the taxonomic status of *Methylobacterium*.  
508 Beyond any taxonomic considerations, neither clade identity assessed by individual genetic

509 markers nor the tremendous ecological diversity among *Methylobacterium* clades can predict all  
510 of the spatial and temporal variation in *Methylobacterium* diversity in nature. In order to define  
511 the niches of *Methylobacterium* clades and to understand the metabolic mechanisms underlying  
512 their contrasted life strategies, future characterization of their functions and genome structure will  
513 be required using phylogenomic approaches.

514  
515 In conclusion, we find that *Methylobacterium* adaptive responses to local environmental variation  
516 in the phyllosphere are driven by both long-term inherited ecological strategies that differ among  
517 major clades within the genus, as well by seasonal changes affecting habitat characteristics and  
518 community structure in the phyllosphere habitat. Overall, our study combining sequencing- and  
519 culture-based approaches provides novel insights into the factors driving fine-scale adaptation of  
520 microbes to their habitats, and in the case of *Methylobacterium* our approach revealed the  
521 particular importance of considering organismal life-history strategies to help understand the  
522 small-scale diversity and dynamic of this ecologically important taxon.

523

524

525

526

527 **Figures and Table**

528

529 **Figure 1 - *Methylobacterium* phylogeny and ecology.** Most of *Methylobacterium* diversity is found  
530 in association with plants, especially in the phyllosphere. Phylogenetic consensus tree (nodal  
531 posterior probabilities indicated next to the branches) from *rpoB* complete nucleotide sequences  
532 available for 153 *Methylobacterium* genomes and rooted on 32 *Methylobacteriaceae* outgroups  
533 (*Microvirga*, *Enterovirga*; no shown; see **Supplementary dataset 1a**). For each genome, species  
534 name, the anthropogenic origin (black squares) and/or environmental origin (color code on top  
535 right) are indicated. Groups A, B, C adapted from Green *et* Ardley (30). Monophyletic clades  
536 within group A (A1-A9) were defined using a  $\geq 92\%$  nucleotide pairwise similarity cut-off on the  
537 *rpoB* complete sequence.

538

539 **Figure 2 - Sampling design.** a) Locations of the two sampled forests MSH (green) and SBL  
540 (orange) in the province of Québec (Canada). b) Time line survey in each forest in 2018 (2-4 time  
541 points available per tree). c-d). Detailed map of each forest and each plot within forests (squares;  
542 6 to 10 trees were sampled per plot; see **Supplementary dataset 1b**). In MSH, plots H0 and L0  
543 were sampled once in 2017 for a pilot survey. In SBL and MSH, plots 1-6 were sampled 4 times  
544 in 2018. For each plot, tree localizations are indicated by point colored according to their  
545 taxonomie (color code on bottom left): ABBA (*Abies balsamea*), ACRU (*Acer rubrum*). ACSA  
546 (*Acer saccharum*), OSVI (*Ostrya virginiana*), QURU (*Quercus rubra*), FAGR (*Fagus*  
547 *grandifolia*), ASPE (*Acer Pennsylvanicum*). Shades of grey indicate elevation (50 m elevation  
548 scale)

549

550 **Figure 3 - Tests for phylogenetic association of traits with culture-based estimation of**  
551 ***Methylobacterium* diversity.** a) Part of variance in *Methylobacterium* isolated diversity  
552 explained by each trait and their interactions (PERMANOVA tests for association; 10,000  
553 permutations; x-axis) in function of pairwise nucleotide similarity as a proxy for phylogenetic  
554 depth (PS; y-axis; see **Supplementary dataset 1i**). PERMANOVA were conducted at different  
555 depths within a consensus phylogenetic tree (nodes with less than 30% of support were collapsed;  
556 legend on top right) drawn from partial *rpoB* nucleotide sequences of 187 isolates (pilot survey in  
557 2017: n=20; timeline survey in 2018: n=167) and 188 *Methylobacteriaceae* reference sequences.

558 The four following traits and their interactions were tested (see Venn diagram on top left for  
559 color code): forest of origin, host tree species, sampling date and temperature of isolation. Points  
560 indicate significant part of variance (legend on the left). b) Test for node association (100,000  
561 permutations) with forest of origin and temperature of isolation (color code on top) mapped on  
562 the *rpoB* phylogeny (scaled on PS values). Frames in the tree indicate nodes significantly  
563 associated with at least one factor (ANOVA; Bonferroni correction;  $p < 0.001$ : “\*\*\*”;  
564  $p < 0.01$ : “\*\*”;  $p < 0.05$ : “\*”). For each isolate (names in bold), colored boxes at the tip of the tree  
565 indicate forest of origin and temperature of isolation.

566

567 **Figure 4 - Short-scale spatial and temporal dynamics of *Methylobacterium* communities**  
568 **assessed by *rpoB* barcoding.** a) A principal component analysis (PCA) on 200  
569 *Methylobacterium* ASVs relative abundance (Hellinger transformation, Bray-Curtis (*BC*)  
570 dissimilarity) shows that 179 phyllosphere samples cluster according to forest of origin (MSH:  
571 open triangles, SBL: full triangles) and date of sampling (detail showed only for MSH). The  
572 significant association of 83 and 25 ASVs with forest of origin and/or sampling date, respectively  
573 (ANOVA, Bonferroni correction;  $p < 0.05$ ; point size proportional to variance; legend on bottom  
574 left) is shown (points colored according to clade assignation; legend on top right). b) Spatial and  
575 c) temporal autocorrelation analyzes conducted in each forest separately. Points represent *BC*  
576 dissimilarity in function of pairwise geographic (*pDist*; b) or pairwise time (*pTime*; c) distance  
577 separating two communities. For each forest and variable, the predicted linear regression  
578 ( $BC \sim pDIST$  or  $\sim pTime$ ) is indicated (full line:  $p < 0.001$ ; dotted line:  $p > 0.05$ ; ANOVA). d) *BC* in  
579 function of sampling time for each forest. e) Detail of spatial autocorrelation analyzes in MSH,  
580 conducted for each sampling time point separately. f) Scaled ML tree (original tree from **Figure**  
581 **S1b** scaled on pairwise nucleotide similarity (PS)) of 200 *Methylobacterium* ASV (points) and  
582 176 reference *rpoB* sequences rooted on *Microvirga* and *Enterovirga* (out group not shown).  
583 Temporal autocorrelation analyzes per forest were conducted for each node supported by at least  
584 30% of bootstraps (200 permutations). For each forest and node, the strength of the slope  
585 (estimate of the linear regression  $BC \sim pTime$ ; proportional to point size) was displayed when  
586 highly significant ( $p < 0.001$ ; ANOVA, Bonferroni correction).

587

588 **Figure 5 - Analysis of 79 *Methylobacterium* isolate growth performances under 4 different**  
589 **temperature treatments.** For each isolate and temperature treatment, the yield ( $Y$ : maximal  
590 growth intensity) and growth rate ( $r$ ; inverse of log+lag time) were estimated from growth  
591 curves. a) Average growth curves (growth intensity in function of time) for each clade (line:  
592 mean value; frame: 1/3 of standard deviation; point: average maximal growth). b)  $r$  in function of  
593  $Y$ . Each point represents the average  $r/Y$  values for an isolate and a temperature treatment (79  
594 isolates x 4 treatments), colored according to clade membership. Ellipsoids are centered on  
595 average values per clade and represent 30% of confidence interval (standard deviation). c)  $r$  (log  
596 scale) in function of time at which samples strains were isolated from were collected, colored  
597 according to the forest of origin. Points: real data; bars: average  $r$  value per forest (n=2) and time  
598 (n=4) category. d)  $r$  in function of  $Y$ , corrected for clade assignement (residuals of the  $r \sim \text{Clade}$   
599 and  $Y \sim \text{Clade}$  linear regressions). Each point represents the average  $r/Y$  residual values for an  
600 isolate and a temperature treatment (79 isolates x 4 treatments), colored according to monitoring  
601 temperature (legend on top right).

602

603

604 **Table 1 - PERMANOVA analysis of variance in *Bacteria* and *Methylobacterium* community**  
 605 **diversity.** *Bacteria* diversity was assessed by *16s* barcoding in 46 phyllosphere samples.  
 606 *Methylobacterium* was assessed by *rpoB* barcoding after filtering out non-*Methylobacterium*  
 607 diversity in 179 phyllosphere samples. Part of variance in dissimilarity ( $R^2$ ; Bray-Curtis index)  
 608 among samples associated with four factors and their possible interactions (*F*: forest of origin; *D*:  
 609 date of sampling; *H*: host tree species; *P*: plot within forest) and their significance are shown  
 610 (10,000 permutations on ASV relative abundance, Hellinger transformation; “\*\*\*\*”:  $p < 0.001$ ;  
 611 “\*\*\*”:  $p < 0.01$ ; “\*”:  $p < 0.05$ .) For 16s, *P* was omitted to conserve degrees of freedom.

| Samples                 | <i>Bacteria</i> (16s) |        | <i>Methylobacterium</i> ( <i>rpoB</i> ) |        |
|-------------------------|-----------------------|--------|-----------------------------------------|--------|
|                         | 46                    |        | 179                                     |        |
| Factor                  | $R^2$                 | Pr(>F) | $R^2$                                   | Pr(>F) |
| Forest of origin (F)    | 0.316***              | <0.000 | 0.324***                                | <0.001 |
| Host tree specie (H)    | 0.156***              | <0.001 | 0.071***                                | <0.001 |
| Time of sampling (D)    | 0.120*                | 0.016  | 0.048***                                | <0.001 |
| Plot within forests (P) | -                     | -      | 0.080***                                | <0.001 |
| F:H                     | 0.020                 | 0.080  | 0.004                                   | 0.110  |
| H:D                     | 0.239                 | 0.217  | 0.074**                                 | 0.028  |
| H:P                     | -                     | -      | 0.043**                                 | 0.007  |
| D:P                     | -                     | -      | 0.058                                   | 0.455  |
| H:D:P                   | -                     | -      | 0.085                                   | 0.052  |
| Residuals               | 0.150                 | -      | 0.213                                   | -      |

612

613

614

615 **Table 2 - Summary of statistics from autocorrelation analyzes on 179 phyllosphere**  
 616 ***Methylobacterium* samples assessed by *rpoB* barcoding (200 ASVs).** For each model, pairwise  
 617 dissimilarity between two communities was assessed with the Bray-Curtis dissimilarity index  
 618 (*BC*) from ASV relative abundance (Hellinger transformation) under a linear model. *Spatial*  
 619 *autocorrelation general models*: *BC* in function of pairwise spatial distance separating two  
 620 sampled trees (*pDist*) and date of sampling (*Date*) and their interaction (*pDist:Date*). Samples  
 621 from forests MSH and SBL were analyzed separately (two models). Only pairwise comparisons  
 622 among samples from a same date were considered. *Spatial autocorrelation models per date*: *BC*  
 623 in function of pairwise spatial distance (*pDist*). Each sampling date (n=4) and forest (n=2) was  
 624 analyzed separately (eight models). *Temporal autocorrelation: general models*: *BC* in function of  
 625 pairwise spatial time separating two sampled trees (*pTime*). Samples from forests MSH and SBL  
 626 were analyzed separately (two models) and all spatial scales were considered. For each model,  
 627 the average and standard deviation of the intercept (mean *BC* value) are indicated. For each  
 628 factor (*pDist*, *Date*, *pDist:Date* and *pTime*), the average and standard deviation of estimates  
 629 (slope) are indicated. Significance of estimates was assessed by ANOVA (“\*\*\*”: p<0.001; “\*\*”:  
 630 p<0.01; “\*”: p<0.05).

| Categories (n)                                                |                 | Intercept (sd)             | Estimates*10 <sup>-3</sup> (sd) |                          |
|---------------------------------------------------------------|-----------------|----------------------------|---------------------------------|--------------------------|
| <i>Spatial autocorrelation general models: lm(BC~pDist*D)</i> |                 |                            |                                 |                          |
| <b>Site (within dates)</b>                                    | <i>BC</i>       | <i>pDist</i>               | <i>D</i>                        | <i>pDist:Date</i>        |
| <b>MSH</b>                                                    | 0.5965 (0.0107) | <b>-0.0041 (0.0192)***</b> | <b>-2.7648 (0.1313)***</b>      | <b>0.0007 (0.0002)**</b> |
| <b>SBL</b>                                                    | 0.6493 (0.0097) | 0.0157 (0.0145)            | <b>-1.5575 (0.1646)***</b>      | 0.0000 (0.0002)          |
| <i>Spatial autocorrelation models per date: lm(BC~pDist)</i>  |                 |                            |                                 |                          |
| <b>Site</b>                                                   | <b>Date</b>     | <i>BC</i>                  | <i>pDist</i>                    |                          |
| <b>MSH</b>                                                    | <b>27 Jun.</b>  | 0.6237 (0.0340)            | -0.0425 (0.0725)                |                          |
|                                                               | <b>6 Aug.</b>   | 0.4919 (0.0112)            | <b>0.0503 (0.0192)**</b>        |                          |
|                                                               | <b>7 Sept.</b>  | 0.3746 (0.0059)            | <b>0.0313 (0.0099)**</b>        |                          |
|                                                               | <b>18 Oct.</b>  | 0.2966 (0.0045)            | <b>0.0795 (0.0073)***</b>       |                          |
| <b>SBL</b>                                                    | <b>20 Jun.</b>  | 0.6868 (0.0146)            | 0.0082 (0.0216)                 |                          |
|                                                               | <b>16 Jul.</b>  | 0.5819 (0.0113)            | 0.0215 (0.0174)                 |                          |
|                                                               | <b>16 Aug.</b>  | 0.5415 (0.0105)            | 0.0114 (0.0150)                 |                          |
|                                                               | <b>20 Sept.</b> | 0.5222 (0.0089)            | 0.0145 (0.0130)                 |                          |
| <i>Temporal autocorrelation general models (BC~pTime)</i>     |                 |                            |                                 |                          |
| <b>Site</b>                                                   | <i>BC</i>       | <i>pTime</i>               |                                 |                          |
| <b>MSH</b>                                                    | 0.4086 (0.0032) | <b>1.0786 (0.0607)***</b>  |                                 |                          |
| <b>SBL</b>                                                    | 0.5789 (0.0030) | <b>0.3012 (0.0617)***</b>  |                                 |                          |

631

632 **Table 3 - Part of variance in yield (*Y*) and growth rate (*r*) measured in 79 *Methylobacterium***  
 633 **isolates grown under 4 temperature treatments.** *Y* and *r* values were transformed in log to  
 634 meet normal distribution. Significance of *Y* and *r* response were evaluated by ANOVA in linear  
 635 models:  $\log(Y) \sim F^*H^*D^*T_p^*T_M^*C$  and  $\log(r) \sim F^*H^*D^*T_p^*T_M^*C$ , respectively, with following  
 636 factors : clade (*C*), forest of origin (*F*), host tree species (*H*), time of sampling (*D*), temperature of  
 637 incubation during pre-conditioning (*T<sub>p</sub>*) and monitoring (*T<sub>M</sub>*) steps and their interactions (only  
 638 significant are shown: “\*\*\*\*”: p<0.001; “\*\*\*”: p<0.01; “\*”: p<0.05).  
 639

|                                            | Rate     | Yield    |
|--------------------------------------------|----------|----------|
| Forest ( <i>F</i> )                        | 0.015*   | 0.002    |
| Host tree species ( <i>H</i> )             | 0.022**  | 0.013**  |
| Date of sampling ( <i>D</i> )              | 0.054*** | 0.013**  |
| Pre-conditioning temperature ( <i>TP</i> ) | 0.001    | 0.014**  |
| Monitoring temperature ( <i>TM</i> )       | 0.158*** | 0.020**  |
| Clade ( <i>C</i> )                         | 0.076*** | 0.306*** |
| <i>F:D</i>                                 | 0.006    | 0.036*** |
| <i>H:D</i>                                 | 0.001    | 0.015**  |
| <i>H:C</i>                                 | 0.006    | 0.058*** |
| <i>D:C</i>                                 | 0.032*   | 0.022*   |
| <i>F:H:D</i>                               | 0.019**  | 0.035*** |
| <i>F:H:C</i>                               | 0.013*   | 0.006    |
| other interactions                         | 0.142    | 0.084    |
| Residuals                                  | 0.456    | 0.377    |

640

641



642 **References**

- 643 1. Vorholt JA. 2012. Microbial life in the phyllosphere. 12. *Nature Reviews Microbiology*  
644 10:828–840.
- 645 2. Lindow SE, Brandl MT. 2003. *Microbiology of the Phyllosphere*. *Appl Environ*  
646 *Microbiol* 69:1875–1883.
- 647 3. Frnkranz M, Wanek W, Richter A, Abell G, Rasche F, Sessitsch A. 2008. Nitrogen  
648 fixation by phyllosphere bacteria associated with higher plants and their colonizing epiphytes of a  
649 tropical lowland rainforest of Costa Rica. 5. *The ISME Journal* 2:561–570.
- 650 4. Laforest-Lapointe I, Messier C, Kembel SW. 2016. Host species identity, site and time  
651 drive temperate tree phyllosphere bacterial community structure. *Microbiome* 4:27.
- 652 5. Laforest-Lapointe I, Messier C, Kembel SW. 2016. Tree phyllosphere bacterial  
653 communities: exploring the magnitude of intra- and inter-individual variation among host  
654 species. *PeerJ* 4:e2367.
- 655 6. Noble AS, Noe S, Clearwater MJ, Lee CK. 2020. A core phyllosphere microbiome exists  
656 across distant populations of a tree species indigenous to New Zealand. *PLOS ONE*  
657 15:e0237079.
- 658 7. Kembel SW, O’Connor TK, Arnold HK, Hubbell SP, Wright SJ, Green JL. 2014.  
659 Relationships between phyllosphere bacterial communities and plant functional traits in a  
660 neotropical forest. *PNAS* 111:13715–13720.
- 661 8. Shade A, Gregory Caporaso J, Handelsman J, Knight R, Fierer N. 2013. A meta-analysis  
662 of changes in bacterial and archaeal communities with time. 8. *The ISME Journal* 7:1493–1506.
- 663 9. Malik AA, Martiny JBH, Brodie EL, Martiny AC, Treseder KK, Allison SD. 2020.  
664 Defining trait-based microbial strategies with consequences for soil carbon cycling under climate  
665 change. 1. *The ISME Journal* 14:1–9.
- 666 10. Moyes AB, Kueppers LM, PettRidge J, Carper DL, Vandehey N, O’Neil J, Frank AC.  
667 2016. Evidence for foliar endophytic nitrogen fixation in a widely distributed subalpine conifer.  
668 *New Phytologist* 210:657–668.
- 669 11. Lajoie G, Kembel SW. 2019. Making the Most of Trait-Based Approaches for Microbial  
670 Ecology. *Trends in Microbiology* 27:814–823.
- 671 12. Nemergut DR, Schmidt SK, Fukami T, O’Neill SP, Bilinski TM, Stanish LF, Knelman  
672 JE, Darcy JL, Lynch RC, Wickey P, Ferrenberg S. 2013. Patterns and Processes of Microbial

- 673 Community Assembly. *Microbiol Mol Biol Rev* 77:342–356.
- 674 13. Cavender-Bares J, Kozak KH, Fine PVA, Kembel SW. 2009. The merging of  
675 community ecology and phylogenetic biology. *Ecology Letters* 12:693–715.
- 676 14. Martiny JBH, Jones SE, Lennon JT, Martiny AC. 2015. Microbiomes in light of traits: A  
677 phylogenetic perspective. *Science* 350.
- 678 15. Tromas N, Taranu ZE, Castelli M, Pimentel JSM, Pereira DA, Marcoz R, Shapiro BJ,  
679 Giani A. 2020. The evolution of realized niches within freshwater *Synechococcus*.  
680 *Environmental Microbiology* 22:1238–1250.
- 681 16. Tromas N, Taranu ZE, Martin BD, Willis A, Fortin N, Greer CW, Shapiro BJ. 2018.  
682 Niche Separation Increases With Genetic Distance Among Bloom-Forming Cyanobacteria. *Front*  
683 *Microbiol* 9.
- 684 17. Thompson LR, Sanders JG, McDonald D, Amir A, Ladau J, Locey KJ, Prill RJ, Tripathi  
685 A, Gibbons SM, Ackermann G, Navas-Molina JA, Janssen S, Kopylova E, Vázquez-Baeza Y,  
686 González A, Morton JT, Mirarab S, Zech Xu Z, Jiang L, Haroon MF, Kanbar J, Zhu Q, Jin Song  
687 S, Kosciulek T, Bokulich NA, Lefler J, Brislawn CJ, Humphrey G, Owens SM, Hampton-  
688 Marcell J, Berg-Lyons D, McKenzie V, Fierer N, Fuhrman JA, Clauset A, Stevens RL, Shade A,  
689 Pollard KS, Goodwin KD, Jansson JK, Gilbert JA, Knight R. 2017. A communal catalogue  
690 reveals Earth’s multiscale microbial diversity. 7681. *Nature* 551:457–463.
- 691 18. Poretsky R, Rodriguez-R LM, Luo C, Tsementzi D, Konstantinidis KT. 2014. Strengths  
692 and Limitations of 16S rRNA Gene Amplicon Sequencing in Revealing Temporal Microbial  
693 Community Dynamics. *PLOS ONE* 9:e93827.
- 694 19. Ranjan R, Rani A, Metwally A, McGee HS, Perkins DL. 2016. Analysis of the  
695 microbiome: Advantages of whole genome shotgun versus 16S amplicon sequencing.  
696 *Biochemical and Biophysical Research Communications* 469:967–977.
- 697 20. Corpe WA, Rheem S. 1989. Ecology of the methylotrophic bacteria on living leaf  
698 surfaces. *FEMS Microbiol Ecol* 5:243–249.
- 699 21. Keppler F, Hamilton JTG, Braß M, Röckmann T. 2006. Methane emissions from  
700 terrestrial plants under aerobic conditions. 7073. *Nature* 439:187–191.
- 701 22. Clarke PH. 1983. *The biochemistry of Methylotrophs* by C. Anthony Academic Press;  
702 London, New York, 1982 xvi + 432 pages. £24.00, \$49.50. *FEBS Letters* 160:303–303.
- 703 23. Anthony C. 1991. Assimilation of carbon by methylotrophs. *Biotechnology* 18:79–109.

- 704 24. Ivanova EG, Doronina NV, Trotsenko YuA. 2001. Aerobic Methylobacteria Are Capable  
705 of Synthesizing Auxins. *Microbiology* 70:392–397.
- 706 25. Madhaiyan M, Poonguzhali S, Lee HS, Hari K, Sundaram SP, Sa TM. 2005. Pink-  
707 pigmented facultative methylotrophic bacteria accelerate germination, growth and yield of  
708 sugarcane clone Co86032 (*Saccharum officinarum* L.). *Biol Fertil Soils* 41:350–358.
- 709 26. Madhaiyan M, Poonguzhali S, Sa T. 2007. Metal tolerating methylotrophic bacteria  
710 reduces nickel and cadmium toxicity and promotes plant growth of tomato (*Lycopersicon*  
711 *esculentum* L.). *Chemosphere* 69:220–228.
- 712 27. Dourado MN, Aparecida Camargo Neves A, Santos DS, Araújo WL. 2015.  
713 Biotechnological and Agronomic Potential of Endophytic Pink-Pigmented Methylotrophic  
714 *Methylobacterium* spp. *Biomed Res Int* 2015.
- 715 28. Ryu JH (Chungbuk NU, Madhaiyan M (Chungbuk NU, Poonguzhali S (Chungbuk NU,  
716 Yim WJ (Chungbuk NU, Indiragandhi P (Chungbuk NU, Kim KA (Chungbuk NU, Anandham R  
717 (Chungbuk NU, Yun JC (National I of AS and T, Kim KH (The U of S, Sa TM (Chungbuk NU.  
718 2006. Plant Growth Substances Produced by *Methylobacterium* spp. and Their Effect on Tomato  
719 (*Lycopersicon esculentum* L.) and Red Pepper (*Capsicum annum* L.) Growth. *Journal of*  
720 *Microbiology and Biotechnology*.
- 721 29. Lee HS, Madhaiyan M, Kim CW, Choi SJ, Chung KY, Sa TM. 2006. Physiological  
722 enhancement of early growth of rice seedlings (*Oryza sativa* L.) by production of phytohormone  
723 of N<sub>2</sub>-fixing methylotrophic isolates. *Biol Fertil Soils* 42:402–408.
- 724 30. Green PN, Ardley JK. 2018. Review of the genus *Methylobacterium* and closely related  
725 organisms: a proposal that some *Methylobacterium* species be reclassified into a new genus,  
726 *Methylorubrum* gen. nov. *International Journal of Systematic and Evolutionary Microbiology*  
727 68:2727–2748.
- 728 31. Chen W-M, Cai C-Y, Li Z-H, Young C-C, Sheu S-Y. 2019. *Methylobacterium*  
729 *oryzihabitans* sp. nov., isolated from water sampled from a rice paddy field. *International Journal*  
730 *of Systematic and Evolutionary Microbiology*, 69:3843–3850.
- 731 32. Feng G-D, Chen W, Zhang X-J, Zhang J, Wang S-N, Zhu H. 2020. *Methylobacterium*  
732 *nonmethylotrophicum* sp. nov., isolated from tungsten mine tailing. *International Journal of*  
733 *Systematic and Evolutionary Microbiology*, 70:2867–2872.
- 734 33. Jia L juan, Zhang K shuai, Tang K, Meng J yu, Zheng C, Feng F ying. 2020.

- 735 *Methylobacterium crusticola* sp. nov., isolated from biological soil crusts. *International Journal of*  
736 *Systematic and Evolutionary Microbiology*, 70:2089–2095.
- 737 34. Kim J, Chhetri G, Kim I, Lee B, Jang W, Kim MK, Seo T. 2020. *Methylobacterium*  
738 *terricola* sp. nov., a gamma radiation-resistant bacterium isolated from gamma ray-irradiated soil.  
739 *International Journal of Systematic and Evolutionary Microbiology*, 70:2449–2456.
- 740 35. Kim J, Chhetri G, Kim I, Kim MK, Seo T. 2020. *Methylobacterium durans* sp. nov., a  
741 radiation-resistant bacterium isolated from gamma ray-irradiated soil. *Antonie van Leeuwenhoek*  
742 113:211–220.
- 743 36. Ten LN, Li W, Elderiny NS, Kim MK, Lee S-Y, Rooney AP, Jung H-Y. 2020.  
744 *Methylobacterium segetis* sp. nov., a novel member of the family *Methylobacteriaceae* isolated  
745 from soil on Jeju Island. *Arch Microbiol* 202:747–754.
- 746 37. Jiang L, An D, Wang X, Zhang K, Li G, Lang L, Wang L, Jiang C, Jiang Y. 2020.  
747 *Methylobacterium planium* sp. nov., isolated from a lichen sample. *Arch Microbiol* 202:1709–  
748 1715.
- 749 38. Pascual JA, Ros M, Martínez J, Carmona F, Bernabé A, Torres R, Lucena T, Aznar R,  
750 Arahal DR, Fernández F. 2020. *Methylobacterium symbioticum* sp. nov., a new species isolated  
751 from spores of *Glomus iranicum* var. *tenuihypharum*. *Curr Microbiol* 77:2031–2041.
- 752 39. Marx CJ, Bringel F, Chistoserdova L, Moulin L, Farhan Ul Haque M, Fleischman DE,  
753 Gruffaz C, Jourand P, Knief C, Lee M-C, Muller EEL, Nadalig T, Peyraud R, Roselli S, Russ L,  
754 Goodwin LA, Ivanova N, Kyrpides N, Lajus A, Land ML, Médigue C, Mikhailova N, Nolan M,  
755 Woyke T, Stolyar S, Vorholt JA, Vuilleumier S. 2012. Complete Genome Sequences of Six  
756 Strains of the Genus *Methylobacterium*. *J Bacteriol* 194:4746–4748.
- 757 40. Tani A, Ogura Y, Hayashi T, Kimbara K. 2015. Complete Genome Sequence of  
758 *Methylobacterium aquaticum* Strain 22A, Isolated from *Racomitrium japonicum* Moss. *Genome*  
759 *Announc* 3.
- 760 41. Minami T, Ohtsubo Y, Anda M, Nagata Y, Tsuda M, Mitsui H, Sugawara M,  
761 Minamisawa K. 2016. Complete Genome Sequence of *Methylobacterium* sp. Strain AMS5, an  
762 Isolate from a Soybean Stem. *Genome Announc* 4.
- 763 42. Morohoshi T, Ikeda T. 2016. Complete Genome Sequence of *Methylobacterium populi* P-  
764 1M, Isolated from Pink-Pigmented Household Biofilm. *Genome Announc* 4.
- 765 43. Belkhef S, Labadie K, Cruaud C, Aury J-M, Roche D, Bouzon M, Salanoubat M,

- 766 Döring V. 2018. Complete Genome Sequence of the Facultative Methylophilic Methylobacterium  
767 extorquens TK 0001 Isolated from Soil in Poland. *Genome Announc* 6.
- 768 44. Vos M, Quince C, Pijl AS, Hollander M de, Kowalchuk GA. 2012. A Comparison of  
769 rpoB and 16S rRNA as Markers in Pyrosequencing Studies of Bacterial Diversity. *PLOS ONE*  
770 7:e30600.
- 771 45. Ogier J-C, Pagès S, Galan M, Barret M, Gaudriault S. 2019. rpoB, a promising marker for  
772 analyzing the diversity of bacterial communities by amplicon sequencing. *BMC Microbiol*  
773 19:171.
- 774 46. Callahan BJ, McMurdie PJ, Rosen MJ, Han AW, Johnson AJA, Holmes SP. 2016.  
775 DADA2: High resolution sample inference from Illumina amplicon data. *Nat Methods* 13:581–  
776 583.
- 777 47. Green PN. 2015. *Methylobacterium*, p. 1–8. *In* *Bergey's Manual of Systematics of*  
778 *Archaea and Bacteria*. American Cancer Society.
- 779 48. Charron G, Leducq JB, Bertin C, Dube AK, Landry CR. 2014. Exploring the northern  
780 limit of the distribution of *Saccharomyces cerevisiae* and *Saccharomyces paradoxus* in North  
781 America. *FEMS Yeast Res* 14:281–8.
- 782 49. Leducq JB, Charron G, Samani P, Dube AK, Sylvester K, James B, Almeida P, Sampaio  
783 JP, Hittinger CT, Bell G, Landry CR. 2014. Local climatic adaptation in a widespread  
784 microorganism. *Proceedings Biological sciences / The Royal Society* 281:20132472.
- 785 50. Zwietering MH, Jongenburger I, Rombouts FM, Riet K van 't. 1990. Modeling of the  
786 Bacterial Growth Curve. *Appl Environ Microbiol* 56:1875–1881.
- 787 51. Lipson DA. 2015. The complex relationship between microbial growth rate and yield and  
788 its implications for ecosystem processes. *Front Microbiol* 6.
- 789 52. MacArthur RH, Wilson EO. 2001. *The Theory of Island Biogeography*. Princeton  
790 University Press.
- 791 53. Cavender-Bares J, Ackerly DD, Baum DA, Bazzaz FA. 2004. Phylogenetic  
792 Overdispersion in Floridian Oak Communities. *The American Naturalist* 163:823–843.
- 793

Environmental sources

- Plant (unknown part)
- Phyllosphere
- Endophyte
- Seed
- Rhizosphere
- Soil
- Fungi or lichen
- Water
- Ocean
- Gut
- Anthropogenic
- unknown

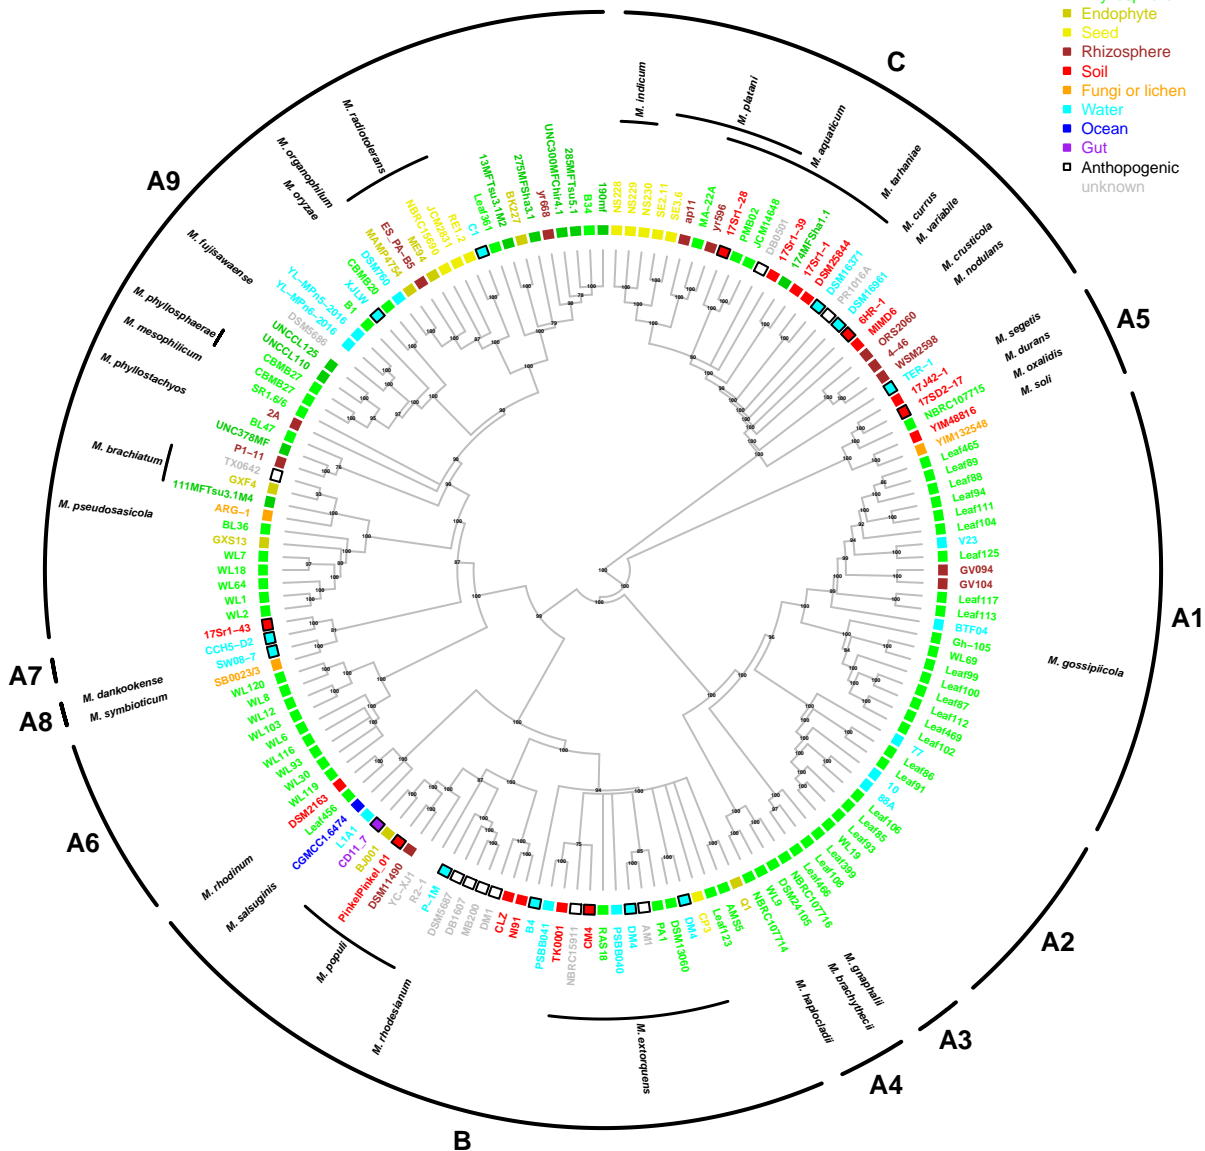

**a**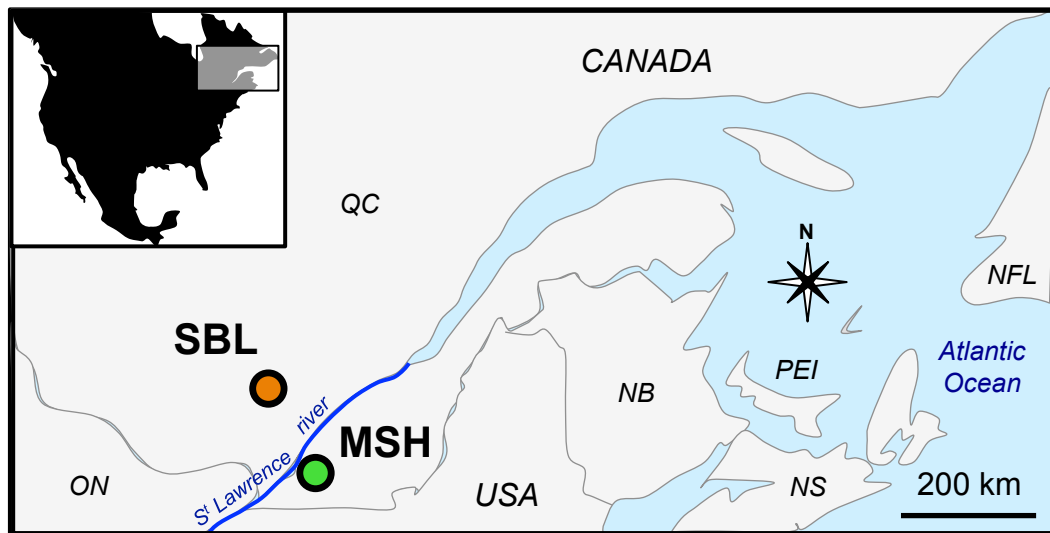**b**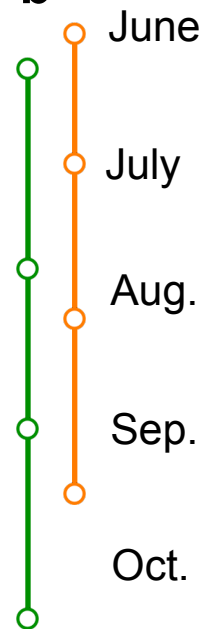**c**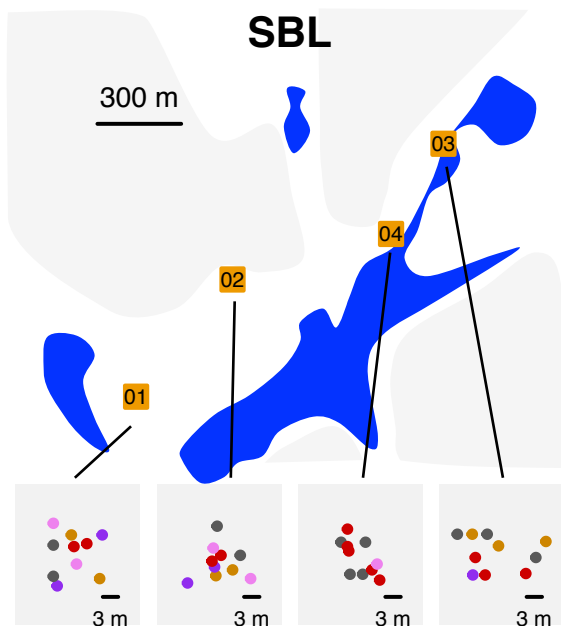**d**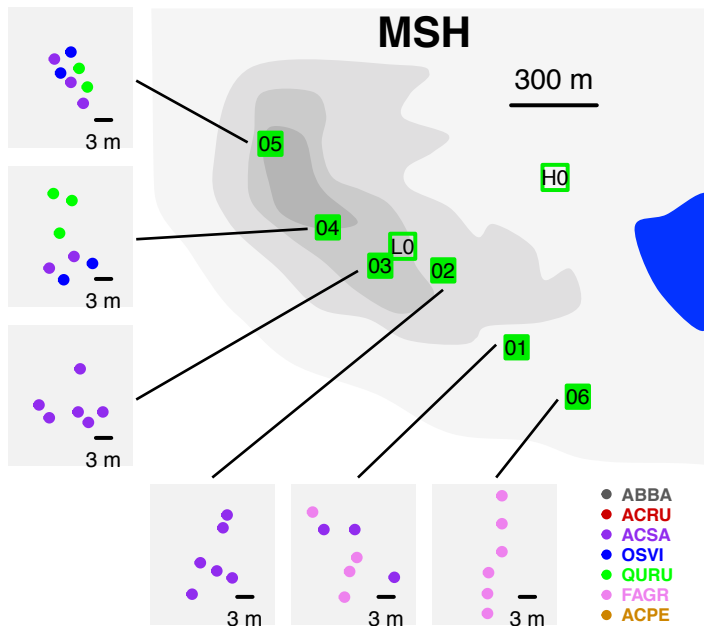

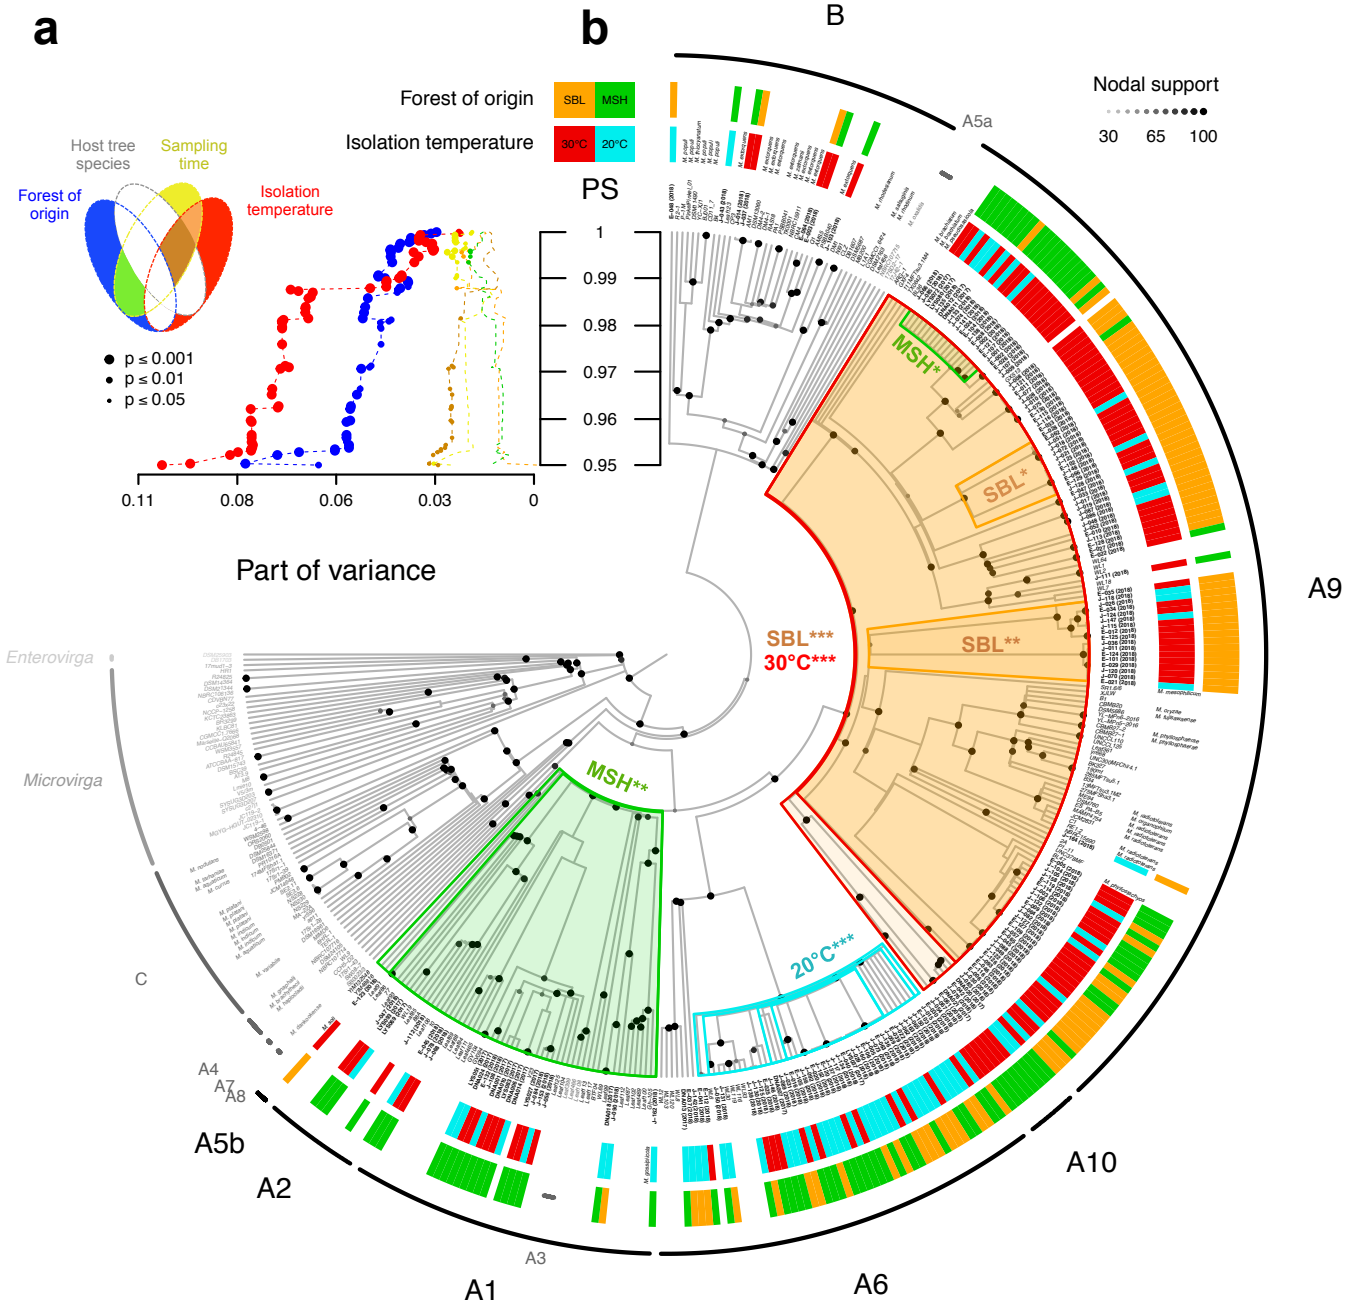



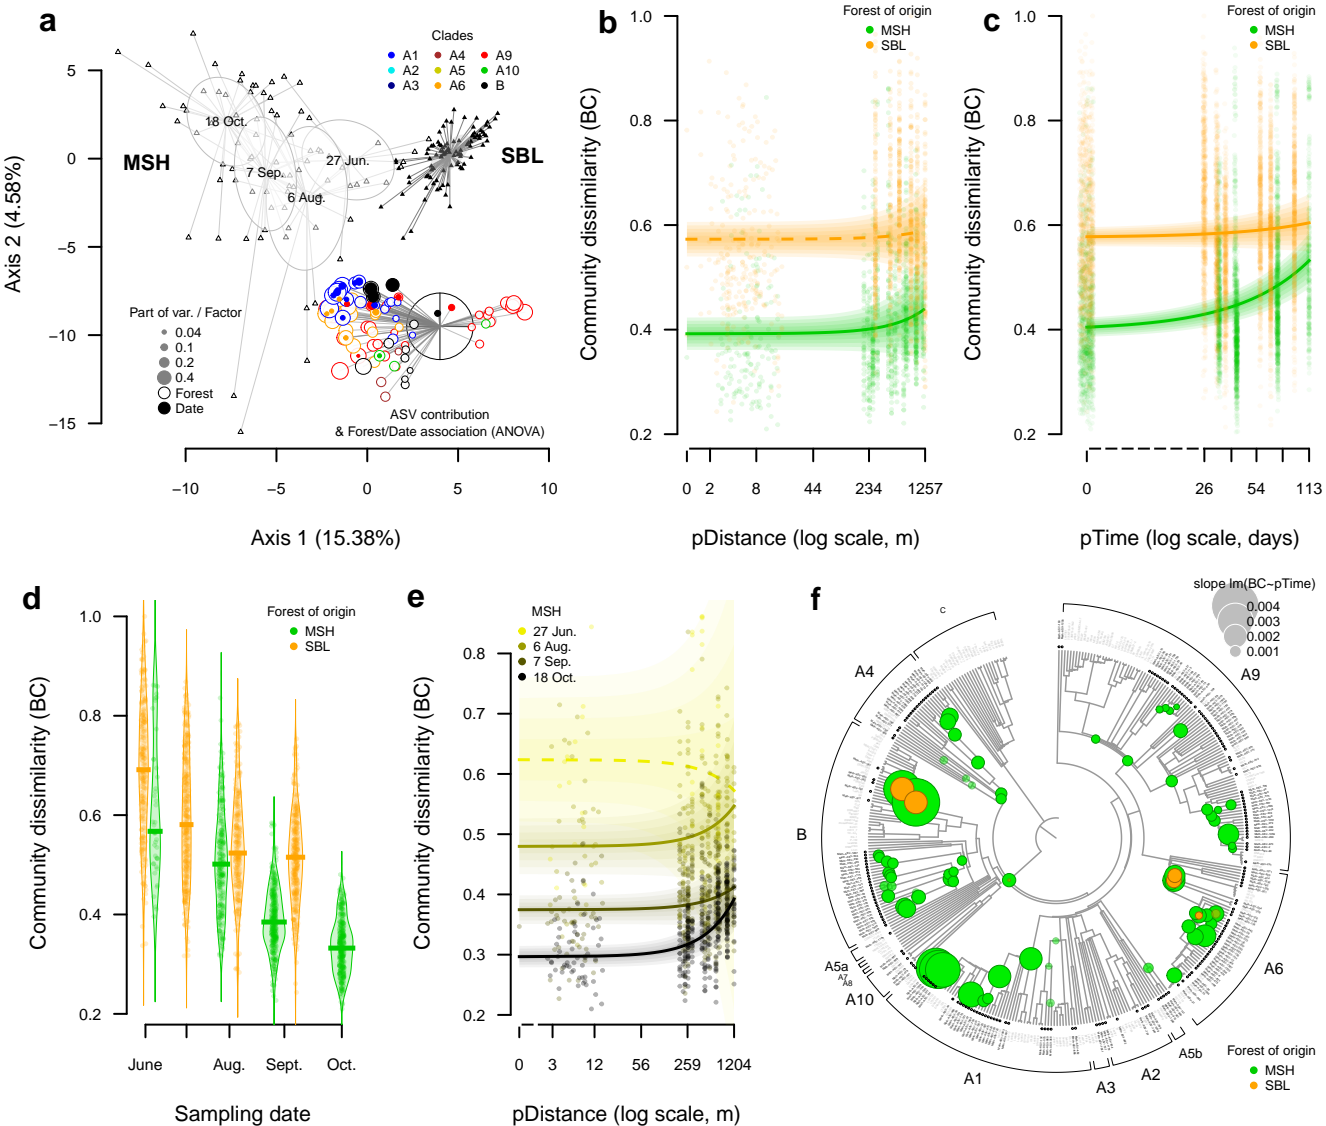

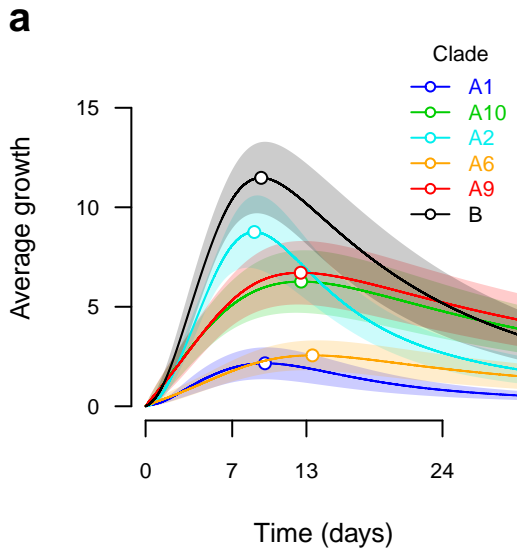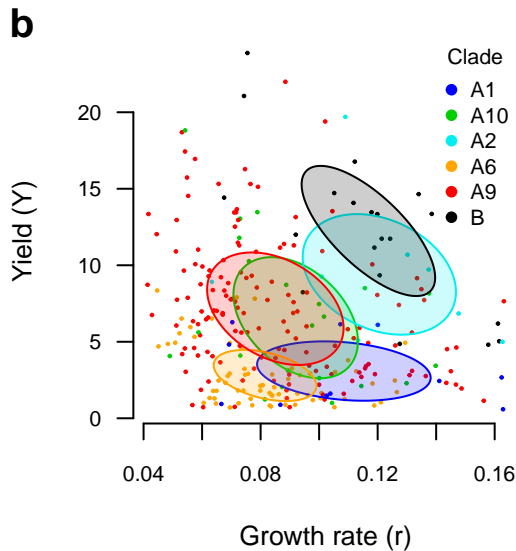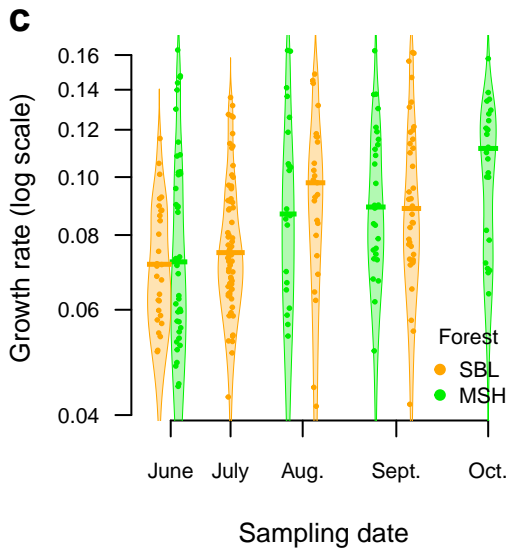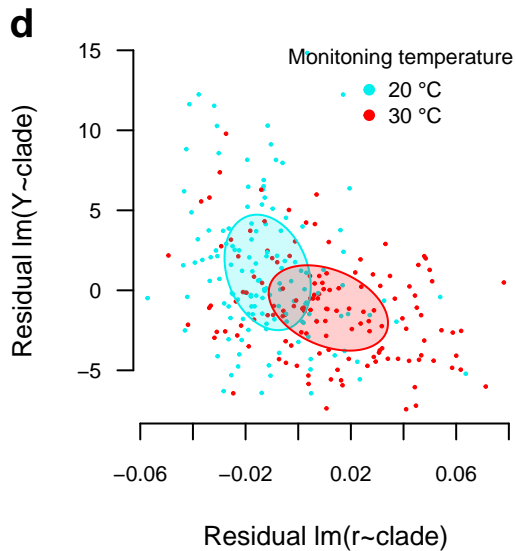

Source: https://www.biorxiv.org/content/10.1101/2021.06.04.447128v5.full.pdf
